# Supplementary material for: Transcriptome Analysis of Dendrobine Biosynthesis in Trichoderma longibrachiatum MD33
Source: Front Microbiol. 2022 Aug 1;13:890733. doi: 10.3389/fmicb.2022.890733 (PMC9376458; doi:10.3389/fmicb.2022.890733)
Supplement: Supplementary file 1 [file Data_Sheet_1.xlsx]

## Sheet: Table S1
Table S1 The detail information of the reads from the transcriptomes
samples	rawReads	cleanReads	Valid(%)	cleanBase(GB)	GC(%)	Q20(%)	Q30(%)
Control_1	41875432	39884618	95.25	5.98	58.09	98.84	95.95
Control_2	43916298	41641318	94.82	6.25	58.11	98.72	95.62
Control_3	47362760	44853934	94.7	6.73	58.18	98.72	95.61
MeJA treatment_1	63671650	60369928	94.81	9.06	58.3	98.47	94.91
MeJA treatment_2	47512610	45268432	95.28	6.79	57.8	98.8	95.81
MeJA treatment_3	44619408	42313868	94.83	6.35	57.83	98.85	95.97

## Sheet: Table S2
Table S2 The size distribution of transcripts and genes
Transcript length interval	200-500	500-1000	1000-2000	>2000	The sum
Number of transcripts	165	1125	3782	16259	21311
Number of genes	104	606	1845	1922	4477

## Sheet: Table S3
Table S3 The length distribution of transcripts and genes
	Min Length	Mean Length	Median Length	Max Length	N50	N90	Total Nucleotides
Transcripts	9469	3509	3850	202	5913	2292	94750351
Genes	40635	3680	3326	202	4302	1775	24865292

## Sheet: Table S4
Table S4 Statistics of the gene annotation in different databases
	Number of Genes	Percentage (%)
Annotated in NR	6037	80.7
Annotated in KO	2920	39.1
Annotated in SwissProt	4885	65.3
Annotated in PFAM	5666	75.8
Annotated in KEGG	1765	23.6
Annotated in GO	4677	62.6
Annotated in KOG	5777	77.3
Annotated in all Databases	1744	23.3
Annotated in at least one Database	6030	80.6
Total Unigenes	7477	100

## Sheet: Table S5
Table S5 qRT-PCR primers used in present study
Gene ID	Gene function	Primer sequence (5’ to 3’)	Product length (bp)	Primer efficiency(%)
Cluster-4787.0	Cytochrome P450	TGCTCTGCTCATACTGGTCATTGC	82	94.54
		AATGCCTGGGATTGGTTTGGGAAG
Cluster-2347.0	Cytochrome P450	TCTTCGCAATGGAGTGGCTGATG	109	106.85
		GGCGTGGCTGATGATGATGTAGTC
Cluster-1340.0	Transcription Factors	GTCCATCACACGCACAGTCACC	105	104.89
		CAGCATCCAGGCAGTCAGGTAATG
Cluster-2215.0	Transcription Factors	TTGTGGAGGGTTGATGTGCTTGG	126	108.78
		AGAGATGCCGATGGACGAGGAC
Cluster-2098.0	Methyltransferase	CGGGCTTGAGGATACTGTTGATCTG	129	85.7
		TGGTGGACGACGAGGAGACAATC
Cluster-4527.0	Methyltransferase	TCGTGTTGCCGTCCAGGAGTAG	93	98.84
		CGCTCAGTGTTCCATCCAGTCAG
Cluster-637.0	Terpenoid	GAATCTCCTGCTCGTTGGCGTAC	107	106.38
		CCTCAAGTTCACTCCCTGGTTCAAG
Cluster-4588.0	Aminotransferase	CGTGGCGATGCTGGAGAATATGG	109	92.49
		ATGGTGCCGATGCTGATGCTTC
Cluster-5638.0	Aminotransferase	ACAGATAGCAAGACAGCAAGAAGCC	98	109.23
		GCCATGAGCAGACGAGCCTATTG
Cluster-5199.0	Aminotransferase	GCCTCCGTCATCTCTTCCATCAAC	128	97.29
		TTAAGCCATCCAATGTGCCAGACC
	GAPDH	TGTCATCTCCAACGCTTCTT	123	110.43
		TTCTGGGTGGCAGTGTAGGA

## Sheet: Table S6
Table S6 The DEGs involved in secondary metabolite biosynthesis between Control and MeJA treatment MD33 Groups
GeneID	MeJA treatment MD33_1	MeJA treatment MD33_2	MeJA treatment MD33_3	Control_1	Control_2	Control_3	logFC(MeJA-treated MD33_vs_Contorol)	Pvalue	FDR	regulation	description
Cluster-6555.0	79	41	20	15	15	4	1.8308	0.0669638	0.499305	up	Q4WR83|0.0|SIDI_ASPFU|Acyl-CoA ligase sidI OS=Neosartorya fumigata (strain ATCC MYA-4609 / Af293 / CBS 101355 / FGSC A1100) OX=330879 GN=sidI PE=2 SV=1
Cluster-6661.0	13.32	34.54	15.42	23.02	0.01	2.21	2.36089	0.136421	0.561205	up	Q6AWU6|8.12e-19|HOL3_ARATH|Probable thiol methyltransferase 2 OS=Arabidopsis thaliana OX=3702 GN=HOL3 PE=1 SV=1
Cluster-5718.0	19.33	28.66	28.25	0	39.23	12.93	1.77376	0.228032	0.639168	up	I1RN13|1.20e-147|SIDA_GIBZE|L-ornithine N(5)-monooxygenase OS=Gibberella zeae (strain PH-1 / ATCC MYA-4620 / FGSC 9075 / NRRL 31084) OX=229533 GN=SID1 PE=2 SV=1
Cluster-308.0	51	35.94	0	9	0	0	2.81994	0.403089	0.749514	up	A0A084API4|0.0|SAT14_STACB|Putative O-acetyltransferase SAT14 OS=Stachybotrys chartarum (strain CBS 109288 / IBT 7711) OX=1280523 GN=SAT14 PE=3 SV=1
Cluster-6461.0	90.89	44.29	44.92	0	48.05	35.03	2.40107	0.131375	0.556867	up	Q12553|0.0|XDH_EMENI|Xanthine dehydrogenase OS=Emericella nidulans (strain FGSC A4 / ATCC 38163 / CBS 112.46 / NRRL 194 / M139) OX=227321 GN=hxA PE=2 SV=2
Cluster-79.1	36.88	173.69	145.2	110.12	0	145.62	1.9514	0.334092	0.71313	up	P55251|0.0|LEUC_RHIPU|3-isopropylmalate dehydratase OS=Rhizomucor pusillus OX=4840 GN=LEUA PE=3 SV=1
Cluster-7111.0	200.71	322.19	0	244.43	0	0	2.91432	0.571858	0.831785	up	Q6N075|9.73e-11|MFSD5_HUMAN|Molybdate-anion transporter OS=Homo sapiens OX=9606 GN=MFSD5 PE=1 SV=2
Cluster-5638.0	36.81	35.98	39.55	0	32.68	44.05	1.85309	0.221301	0.635111	up	O14192|6.84e-135|AATR1_SCHPO|Aromatic amino acid aminotransferase C56E4.03 OS=Schizosaccharomyces pombe (strain 972 / ATCC 24843) OX=284812 GN=SPAC56E4.03 PE=3 SV=1
Cluster-5994.0	38.29	36.36	14.4	0	9.85	67.67	1.75425	0.26978	0.669065	up	A4QUT2|0.0|KATG2_MAGO7|Catalase-peroxidase 2 OS=Magnaporthe oryzae (strain 70-15 / ATCC MYA-4617 / FGSC 8958) OX=242507 GN=KATG2 PE=1 SV=1
Cluster-5859.0	18.49	57.54	28.59	10.85	0	0	4.24357	0.0528776	0.484565	up	P54964|3.83e-51|ORN_YEAST|Oligoribonuclease, mitochondrial OS=Saccharomyces cerevisiae (strain ATCC 204508 / S288c) OX=559292 GN=REX2 PE=1 SV=1
Cluster-3197.0	23.41	11.74	12.23	23.76	25.05	56.82	-1.27082	0.0650349	0.499305	down	Q70FG7|1.73e-35|DODA_BETVU|4,5-DOPA dioxygenase extradiol OS=Beta vulgaris OX=161934 GN=DODA PE=1 SV=1
Cluster-3552.1	9.42	26.38	7.37	44.33	22.71	26.16	-1.48329	0.0584429	0.488129	down	Q00719|9.56e-27|MDMC_STRMY|O-methyltransferase MdmC OS=Streptomyces mycarofaciens OX=1949 GN=mdmC PE=3 SV=1
Cluster-3652.0	522	396	148	766	627	1234	-1.61798	0.0090844	0.447383	down	B0Y7Q8|0.0|BGLF_ASPFC|Probable beta-glucosidase F OS=Neosartorya fumigata (strain CEA10 / CBS 144.89 / FGSC A1163) OX=451804 GN=bglF PE=3 SV=2
Cluster-4587.0	7	0	0	18.79	0	28.12	-2.58269	0.349506	0.718245	down	I1RF57|5.48e-05|AURR2_GIBZE|Aurofusarin cluster transcription factor aurR2 OS=Gibberella zeae (strain PH-1 / ATCC MYA-4620 / FGSC 9075 / NRRL 31084) OX=229533 GN=aurR2 PE=2 SV=1
